# Supplementary material
Source: publisher site journal article supplement (https://www.dovepress.com/article/372389)
Supplement: Supplementary file 1 [file get_supplementary_file.php]

Supplementary Materials

# 1. Supplementary Tables and Figures

## *Supplementary Tables*

Supplementary Table 1. Exploring the maximum tolerated concentration of ATR.

| Group | Conc. (µM) | Number of death | Mortality rate(%) | State |
| --- | --- | --- | --- | --- |
| Control | – | 0 | 0 | No obvious abnormality |
| Model | – | 0 | 0 | No obvious abnormality |
| ATR | 1.95 | 0 | 0 | Similar to model group status |
| 3.91 | 0 | 0 | Similar to model group status |
| 7.81 | 0 | 0 | Similar to model group status |
| 15.6 | 0 | 0 | Worse than the model group |
| 31.2 | 30 | 100 | **–** |

Supplementary Table 2. Metabolites with significant changes in the EtOH group compared to the control group.

| **Class** | **Metabolite** | ***p*** | **log2FC** | **VIP** |
| --- | --- | --- | --- | --- |
| Benzoic Acids | Gallic acid | 0.025974 | -2.26567 | 1.074937 |
| Fatty Acids | 2-Hydroxy-3-methylbutyric acid | 0.002165 | -0.98949 | 1.0109 |
| Organic Acids | alpha-Ketoisovaleric acid | 0.015152 | 0.455075 | 1.321392 |
| Carbohydrates | Xylose | 0.004329 | -1.49539 | 1.472224 |
| Bile Acids | 3-DHCA | 0.025974 | 2.09986 | 1.369114 |
| Bile Acids | HCA | 0.015152 | 4.085047 | 1.282365 |
| Fatty Acids | Nonanoic acid | 0.006554 | -0.78561 | 1.330351 |
| Bile Acids | CDCA | 0.025974 | 2.211668 | 1.030496 |
| Fatty Acids | gamma-Linolenic acid | 0.025974 | -1.55768 | 1.173631 |
| Bile Acids | UCA | 0.015152 | 3.206599 | 1.389166 |
| Amino Acids | Lysine | 0.013485 | -0.78688 | 1.240226 |
| Amino Acids | Ornithine | 0.002165 | -1.43575 | 1.325676 |
| Amino Acids | Glutamine | 0.004329 | -0.96867 | 1.446657 |
| Amino Acids | Cystine | 0.007096 | 0.480419 | 1.199874 |
| Amino Acids | beta-Alanine | 0.002165 | -2.07159 | 1.383653 |
| Amino Acids | Alanine | 0.007365 | -0.96506 | 1.338694 |
| Amino Acids | Serine | 0.033682 | -0.4566 | 1.141814 |
| Organic Acids | Hydroxypropionic acid | 0.002713 | -0.89036 | 1.466604 |
| Amino Acids | Aminocaproic acid | 0.025974 | -1.2613 | 1.199388 |
| Organic Acids | Lactic acid | 0.002165 | -2.37715 | 1.100815 |
| Pyridines | Nicotinic acid | 0.008658 | -1.78846 | 1.366232 |
| Amino Acids | 2-Phenylglycine | 0.018606 | -1.64184 | 1.263885 |
| Amino Acids | Tyrosine | 0.012779 | -1.13642 | 1.295887 |
| Amino Acids | Phenylalanine | 0.034795 | -0.79956 | 1.161743 |
| Fatty Acids | 2-Butenoic acid | 0.008658 | -1.96196 | 1.211263 |
| Pyridines | Picolinic acid | 0.024022 | -0.85035 | 1.198589 |
| Benzenoids | Phenylacetic acid | 0.019927 | -0.82486 | 1.20198 |
| Indoles | Indole-3-carboxylic acid | 0.015231 | -1.33463 | 1.259173 |
| Organic Acids | Glutaric acid | 0.002165 | -3.78208 | 1.724256 |
| Phenylpropanoic Acids | 2-Phenylpropionate | 0.031667 | -1.29694 | 1.092163 |
| Fatty Acids | Azelaic acid | 0.008658 | -1.77727 | 1.478014 |
| Carbohydrates | Glyceric acid | 0.006055 | -0.93622 | 1.325244 |
| SCFAs | Acetic acid | 0.025974 | -1.10582 | 1.277761 |
| Amino Acids | Valine | 0.031316 | -0.57287 | 1.164943 |
| Carbohydrates | Glucose | 0.004329 | -2.60008 | 1.325425 |
| Amino Acids | Methionine | 0.029158 | -0.75838 | 1.138673 |
| Carbohydrates | Ribulose | 0.000442 | -2.18993 | 1.4806 |
| Carbohydrates | Xylulose | 0.000748 | -1.9169 | 1.458447 |
| Carbohydrates | Fructose | 0.041126 | -3.60284 | 1.135341 |
| Phenols | Homovanillic acid | 0.004998 | -1.3595 | 1.130866 |
| SCFAs | Butyric acid | 0.015152 | -3.17994 | 1.153925 |
| Fatty Acids | Methylsuccinic acid | 0.002165 | -3.60824 | 1.73997 |
| Fatty Acids | Adipic acid | 0.035421 | -0.57973 | 1.119591 |
| Fatty Acids | Methylglutaric acid | 0.002165 | -4.92347 | 1.453902 |
| Fatty Acids | 3-Methyladipic acid | 0.008658 | -3.51656 | 1.451638 |
| SCFAs | Caproic acid | 0.004329 | -4.31738 | 1.268428 |
| Fatty Acids | Heptanoic acid | 0.015152 | -3.94876 | 1.290884 |
| Bile Acids | TDCA | 0.008658 | 5.12762 | 1.130074 |
| Bile Acids | wMCA | 0.041126 | 3.492665 | 1.129966 |
| Bile Acids | aMCA | 0.025974 | 3.945062 | 1.18839 |
| Fatty Acids | Octanoic acid | 0.015152 | -2.91074 | 1.32589 |
| Bile Acids | bHDCA | 0.027303 | 1.082043 | 1.177631 |
| Fatty Acids | Decanoic acid | 0.006684 | -1.26896 | 1.296414 |
| Bile Acids | DCA | 0.041126 | 2.672185 | 1.293802 |
| Fatty Acids | Myristic acid | 0.007992 | -0.61237 | 1.340303 |
| Fatty Acids | Pentadecanoic acid | 0.041126 | 1.759705 | 1.338955 |
| Fatty Acids | Arachidonic acid | 0.008658 | 1.226881 | 1.116789 |
| Fatty Acids | Adrenic acid | 0.004329 | 3.1622 | 1.494312 |
| Fatty Acids | Citramalic acid | 0.0096 | -1.87384 | 1.28985 |
| Fatty Acids | Heptadecanoic acid | 0.025974 | 1.409819 | 1.105994 |
| Bile Acids | NorCA | 0.041126 | 2.193247 | 1.324216 |

**Supplementary** **Table 3.** Metabolites with significant changes in the ATR group compared to the EtOH group.

| **Class** | **Metabolite** | ***p*** | **log2FC** | **VIP** |
| --- | --- | --- | --- | --- |
| Amino Acids | Threonine | 0.035777 | 0.660131 | 1.148663 |
| Fatty Acids | 2-Hydroxy-3-methylbutyric acid | 0.006112 | 1.198756 | 1.420343 |
| Phenylpropanoids | Cinnamic acid | 0.004221 | 1.27327 | 1.433652 |
| Carbohydrates | Xylose | 0.004329 | 1.158172 | 1.299099 |
| Fatty Acids | gamma-Linolenic acid | 0.015152 | 1.915938 | 1.379328 |
| Bile Acids | UCA | 0.038008 | -1.45035 | 1.158223 |
| Amino Acids | Lysine | 0.004666 | 0.95524 | 1.381553 |
| Amino Acids | Ornithine | 0.004329 | 1.732697 | 1.486889 |
| Amino Acids | Glutamine | 0.002889 | 0.88919 | 1.486965 |
| Amino Acids | beta-Alanine | 0.025974 | 1.183029 | 1.077951 |
| Amino Acids | Alanine | 0.000346 | 1.144466 | 1.535535 |
| Amino Acids | Serine | 0.003057 | 0.674207 | 1.463318 |
| Organic Acids | Hydroxypropionic acid | 0.004329 | 0.864752 | 1.134244 |
| Amino Acids | Aminocaproic acid | 0.025974 | 1.429438 | 1.283432 |
| Organic Acids | Lactic acid | 0.025974 | 2.73874 | 1.218157 |
| Pyridines | Nicotinic acid | 0.004329 | 1.13396 | 1.104903 |
| Amino Acids | 2-Phenylglycine | 0.007201 | 1.64516 | 1.181361 |
| Amino Acids | Tyrosine | 0.004279 | 0.998953 | 1.373928 |
| Amino Acids | Phenylalanine | 0.009045 | 0.900768 | 1.33313 |
| Fatty Acids | 2-Butenoic acid | 0.004329 | 2.730742 | 1.226088 |
| Pyridines | Picolinic acid | 0.00175 | 1.02847 | 1.425252 |
| SCFAs | Ethylmethylacetic acid | 0.000616 | 1.138874 | 1.443777 |
| Benzenoids | Phenylacetic acid | 9.15E-05 | 1.144371 | 1.567845 |
| Indoles | Indole-3-carboxylic acid | 0.008504 | 1.362504 | 1.307628 |
| Organic Acids | Glutaric acid | 0.002165 | 3.28733 | 1.297737 |
| Phenylpropanoic Acids | 2-Phenylpropionate | 0.00659 | 1.212673 | 1.189478 |
| Phenylpropanoic Acids | Hydrocinnamic acid | 0.006401 | 1.280034 | 1.202907 |
| Indoles | Indole-3-propionic acid | 0.002506 | 1.062381 | 1.388039 |
| Fatty Acids | Azelaic acid | 0.005792 | 1.281505 | 1.223592 |
| Amino Acids | Glycine | 0.041126 | 1.003999 | 1.20249 |
| Organic Acids | Glycolic acid | 0.036852 | 0.576314 | 1.035019 |
| Carbohydrates | Glyceric acid | 0.025974 | 0.962389 | 1.116217 |
| SCFAs | Acetic acid | 0.007836 | 1.010315 | 1.231074 |
| Carbohydrates | Glucose | 0.015152 | 2.10388 | 1.122223 |
| Amino Acids | Methionine | 0.002023 | 0.945238 | 1.393185 |
| Organic Acids | 2-Hydroxybutyric acid | 0.024992 | 6.212841 | 1.247192 |
| Amino Acids | Isoleucine | 0.043476 | 0.692274 | 1.165956 |
| Amino Acids | Leucine | 0.032873 | 0.702367 | 1.146634 |
| Carbohydrates | Ribulose | 0.001331 | 1.939723 | 1.46334 |
| Carbohydrates | Xylulose | 0.003027 | 1.759397 | 1.395932 |
| SCFAs | Propionic acid | 0.0108 | 0.721508 | 1.089402 |
| Phenols | Homovanillic acid | 0.001491 | 1.683914 | 1.450355 |
| Amino Acids | Tryptophan | 0.002165 | 0.95252 | 1.25043 |
| SCFAs | Butyric acid | 0.008658 | 2.221292 | 1.210433 |
| SCFAs | Isobutyric acid | 0.000193 | 0.731551 | 1.457778 |
| Organic Acids | Malonic acid | 0.015152 | 0.778737 | 1.175636 |
| SCFAs | Isovaleric acid | 0.006557 | 0.578855 | 1.242467 |
| SCFAs | Valeric acid | 0.002444 | 1.024241 | 1.294011 |
| Phenylpropanoic Acids | Phenyllactic acid | 0.008658 | 2.6808 | 1.126021 |
| Fatty Acids | Methylsuccinic acid | 0.002165 | 3.248221 | 1.448858 |
| Fatty Acids | Methylglutaric acid | 0.004329 | 3.777306 | 1.216094 |
| Fatty Acids | 3-Methyladipic acid | 0.025974 | 3.145354 | 1.210559 |
| SCFAs | Caproic acid | 0.015152 | 3.543461 | 1.236396 |
| Fatty Acids | Heptanoic acid | 0.008658 | 3.667902 | 1.304838 |
| Bile Acids | TDCA | 0.025974 | -3.48998 | 1.053988 |
| Fatty Acids | Octanoic acid | 0.015152 | 2.774691 | 1.226304 |
| Bile Acids | bHDCA | 0.011077 | -1.43068 | 1.189917 |
| Bile Acids | HDCA | 0.025974 | -2.55313 | 1.261337 |
| Fatty Acids | Decanoic acid | 0.022283 | 0.897833 | 1.062017 |
| Fatty Acids | EPA | 0.008534 | 1.249452 | 1.293683 |
| Fatty Acids | DHA | 0.01416 | 0.718817 | 1.219818 |
| Fatty Acids | Adrenic acid | 0.015152 | -1.86416 | 1.191417 |
| Fatty Acids | Citramalic acid | 0.007583 | 2.051471 | 1.2684 |
| Fatty Acids | Heptadecanoic acid | 0.025974 | -1.38127 | 1.029912 |
| Fatty Acids | Oleic acid | 0.027639 | 0.316031 | 1.140504 |
| Bile Acids | NorCA | 0.041126 | -2.21936 | 1.158985 |

# *1.2. Supplementary Figure*

Supplementary Figure 1. Heatmap of potential biomarkers


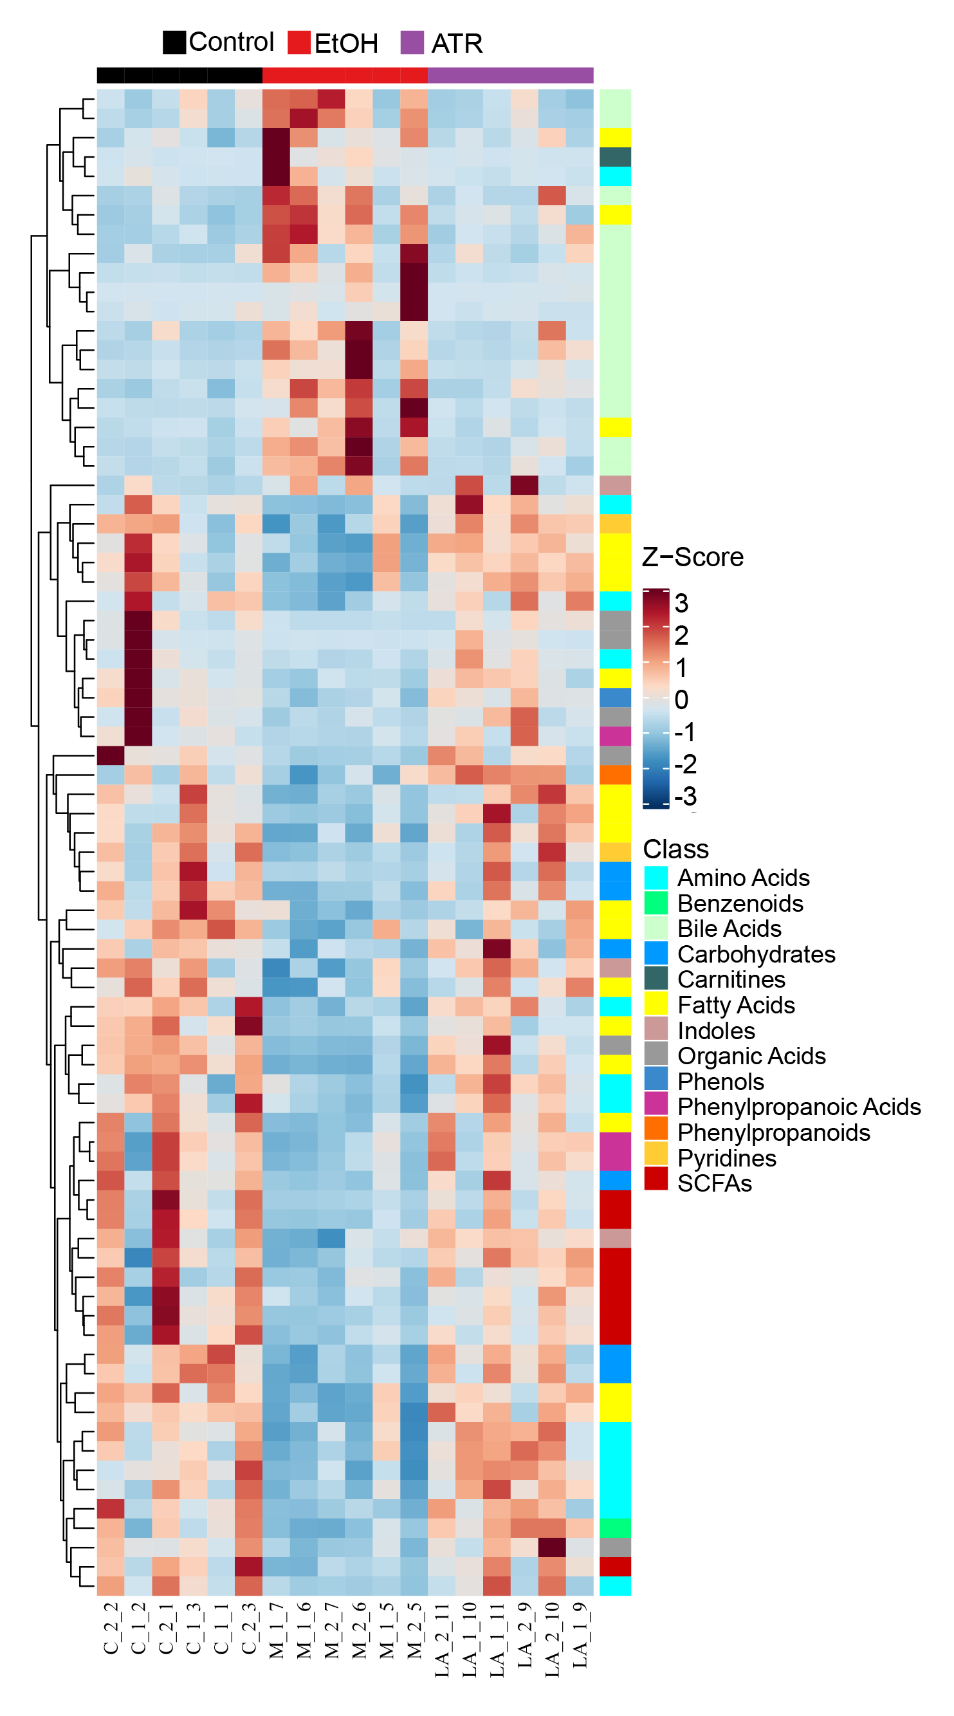


Supplementary Figure 1. Heatmap of potential biomarkers
